# Supplementary material for: Liposome-Encapsulated Bacillus Calmette–Guérin Cell Wall Skeleton Enhances Antitumor Efficiency for Bladder Cancer In Vitro and In Vivo via Induction of AMP-Activated Protein Kinase
Source: PubMed Central journal article supplement (PMC7762541; doi:10.3390/cancers12123679), 2020-12-08

**Supplementary Materials: Liposome-Encapsulated Bacillus Calmette–Guérin Cell Wall Skeleton Enhances Antitumor Efficiency for Bladder Cancer In Vitro and In Vivo via Induction of Amp-Activated Protein Kinase**

Young Mi Whang, Da Hyeon Yoon, Gwang Yong Hwang, Hoyub Yoon, Serk In Park, Young Wook Choi, and In Ho Chang

# Supplementary Fig. 1

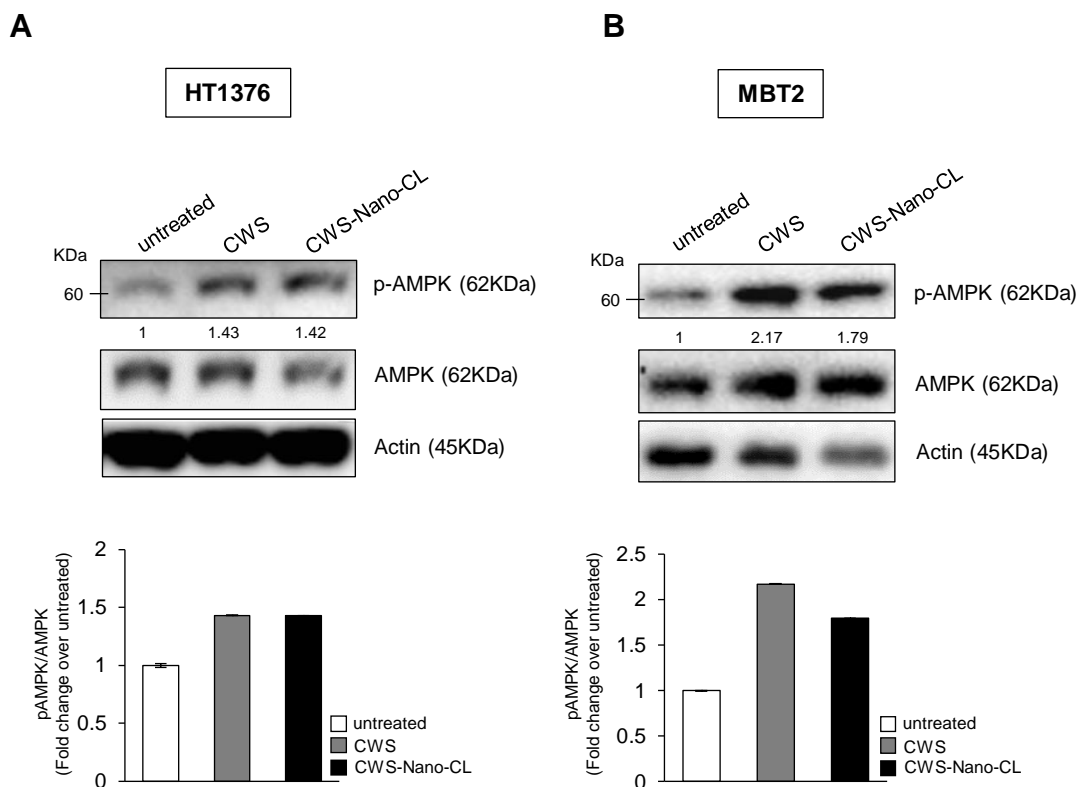

**Figure S1.** Effects of CWS-loaded formulations on AMPK phosphorylation in HT1376 (A) and MBT2 (B) cells. Cells were treated with 1  $\mu$ g/ml of CWS-loaded formulations for 24 hours, and phosphorylated AMPK $\alpha$  to total AMPK $\alpha$  protein expression was assessed by western blotting. Actin was used the loading control. The blots are representative of three independent experiments. The quantification graphs are represented, p-AMPK/AMPK ratios determined by densitometric analyses. All expression ratios were normalized to the untreated group.

## Supplementary Fig. 2

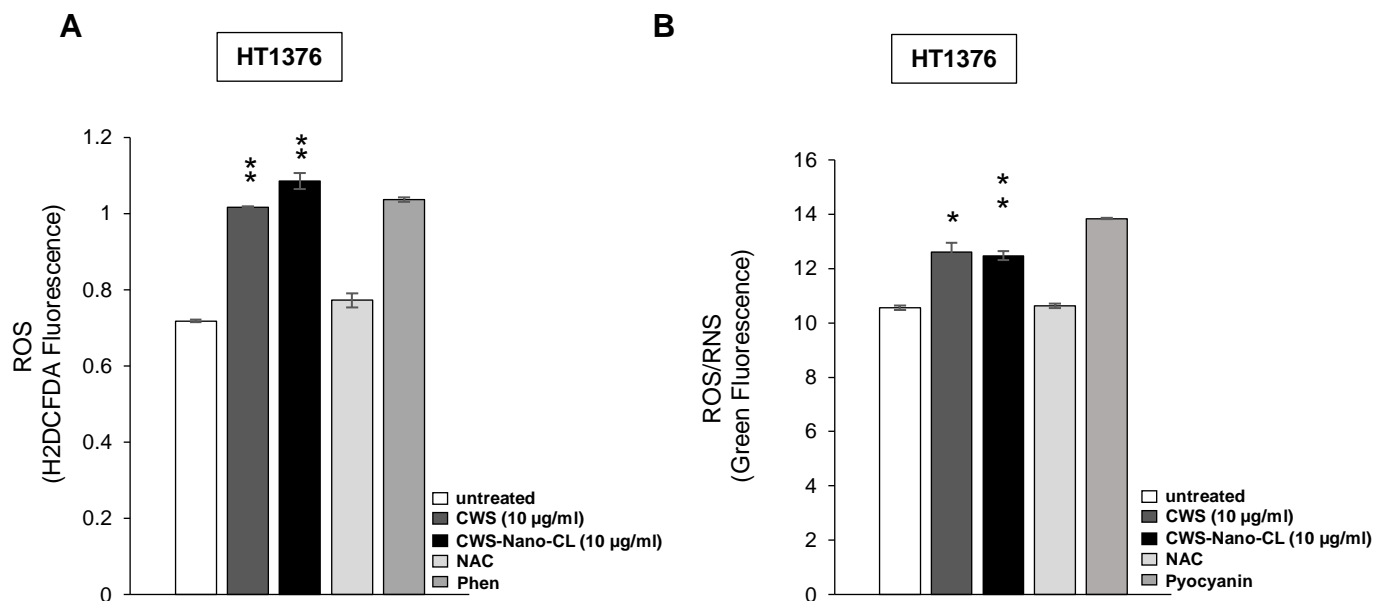

**Figure S2.** Effects of CWS-loaded formulations on ROS production in HT1376 cells. Cells were treated with 10 µg/ml of CWS or CWS-Nano-CL for 24 hours, then treated with NAC (2 mM, positive control) for 30 minutes. After washing, cells were treated with H2DCFDA (10 µM) for 1 hour prior to measurement. ROS/RNS production was measured using ROS-ID® ROS/RNS detection kit. Pyocyanin (500 µM) and NAC (5 mM) were added as a positive and a negative control for 30 min. \*,  $p < 0.005$ , \*\*,  $p < 0.0005$ , untreated/CWS, or untreated/CWS-Nano-CL. Data are mean  $\pm$  SEM (n=6).

# Supplementary Fig. 3

D

5637

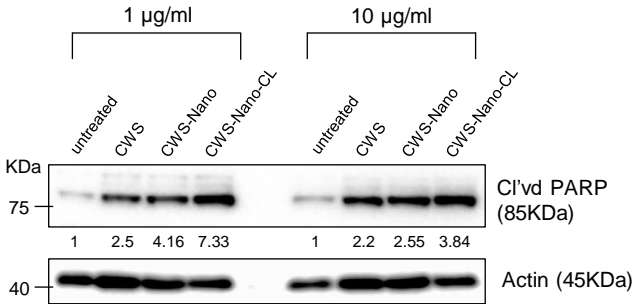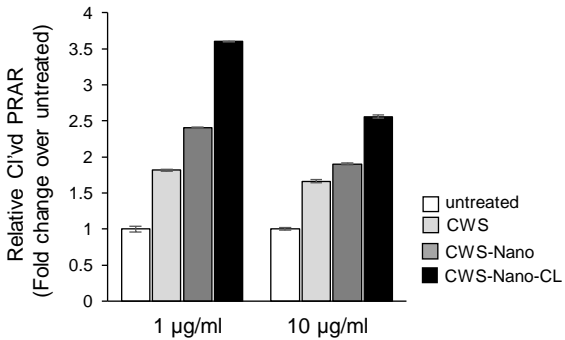

Figure S3. The quantitation results of Figure 2D.

# Supplementary Fig. 4

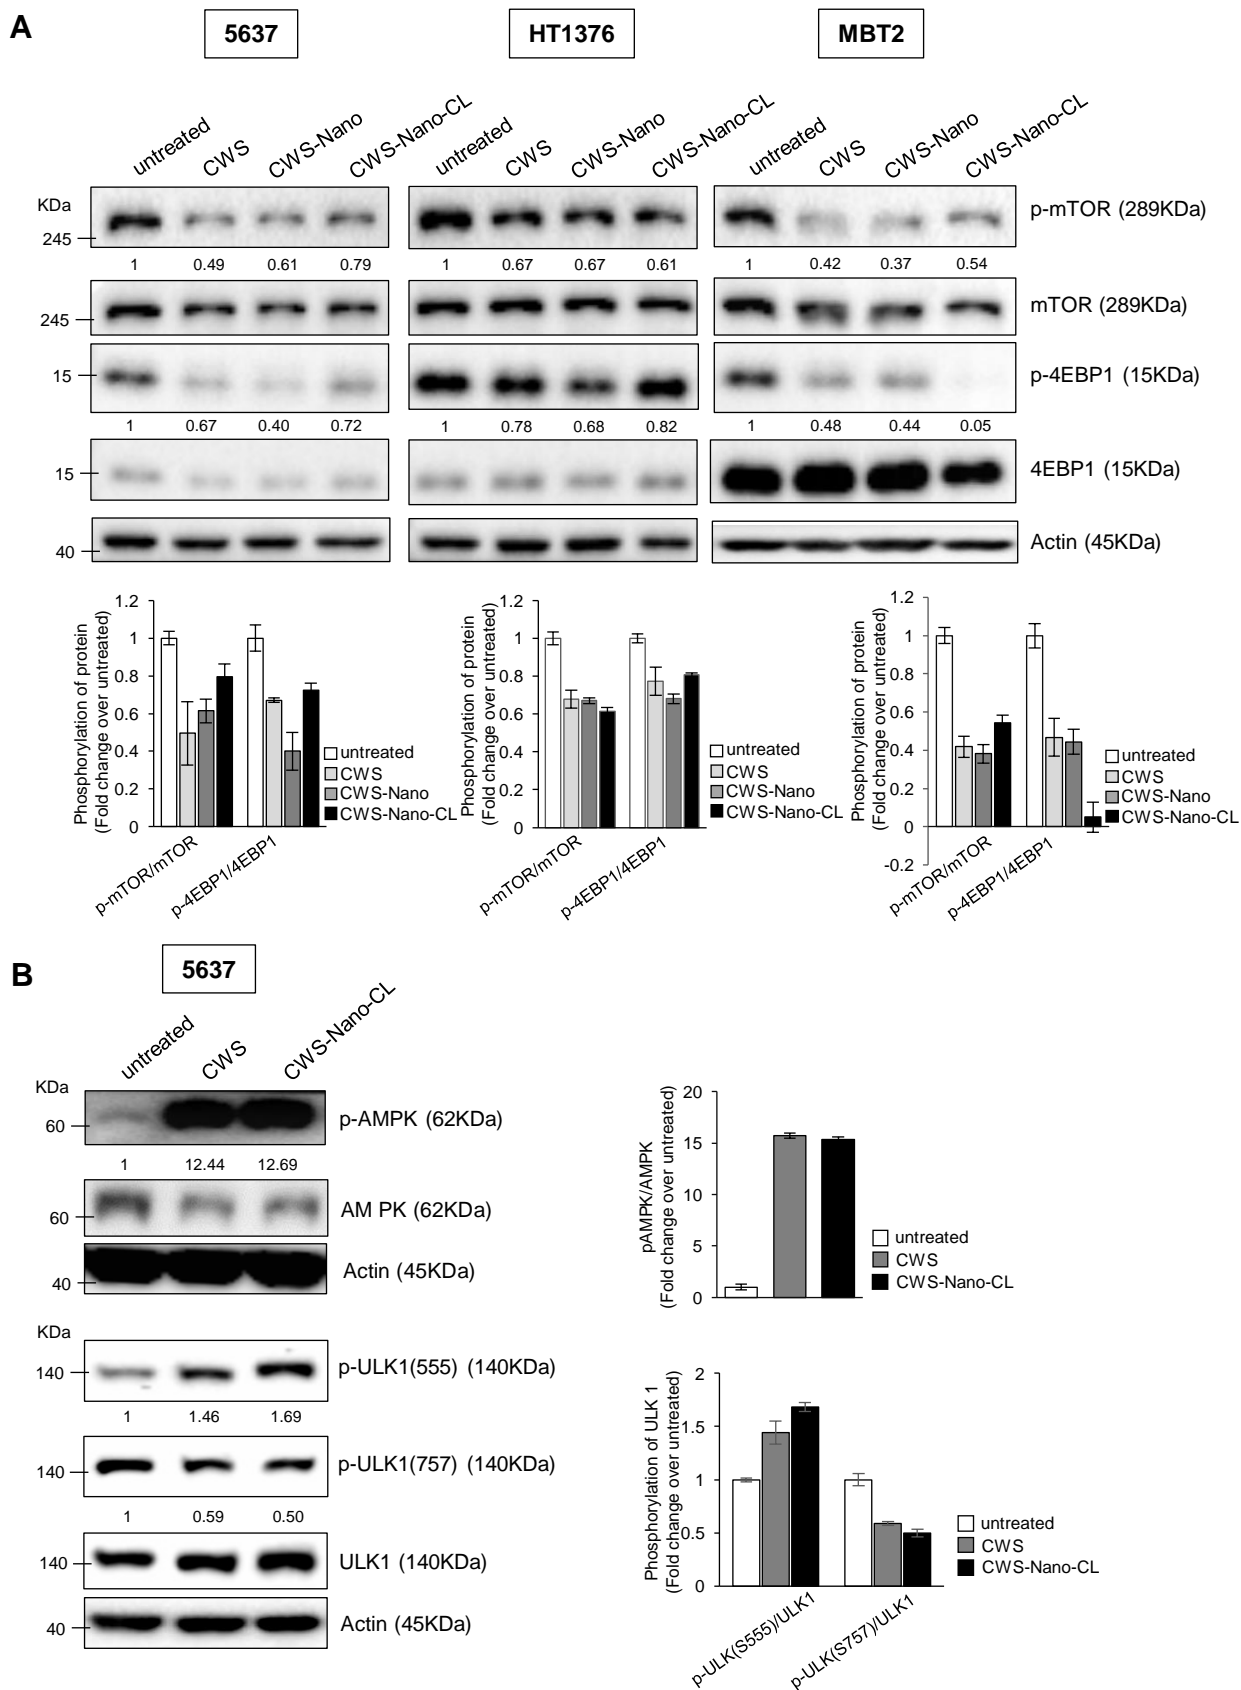

**Figure S4.** The quantitation results of Figure 3A and 3B.

**C**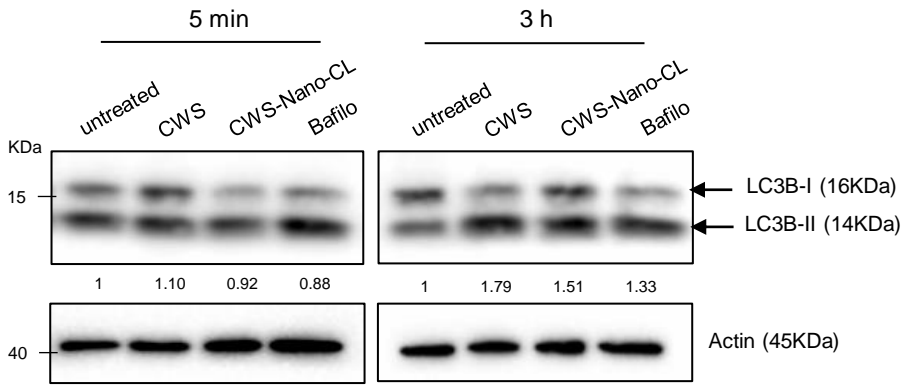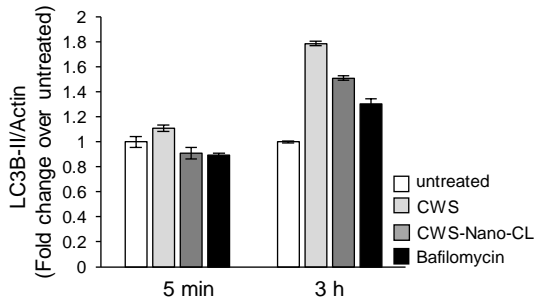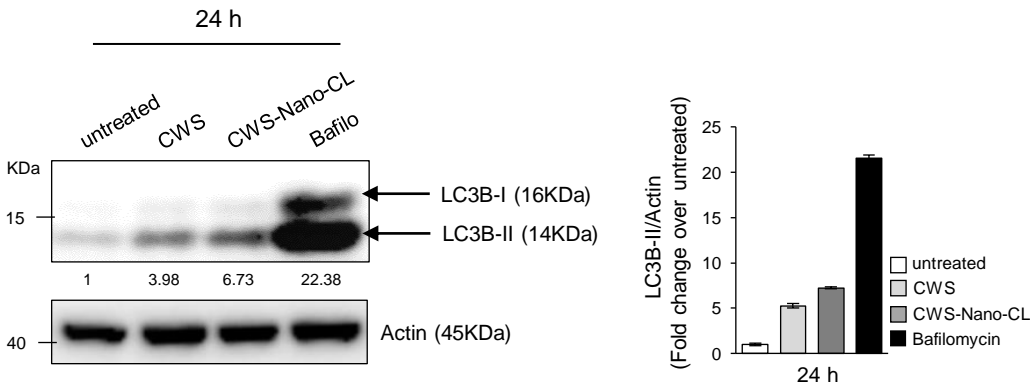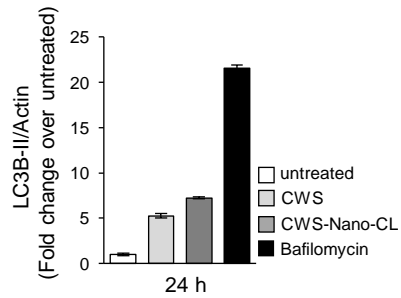**Figure S4.** The quantitation results of Figure 3C

# Supplementary Fig. 5

A

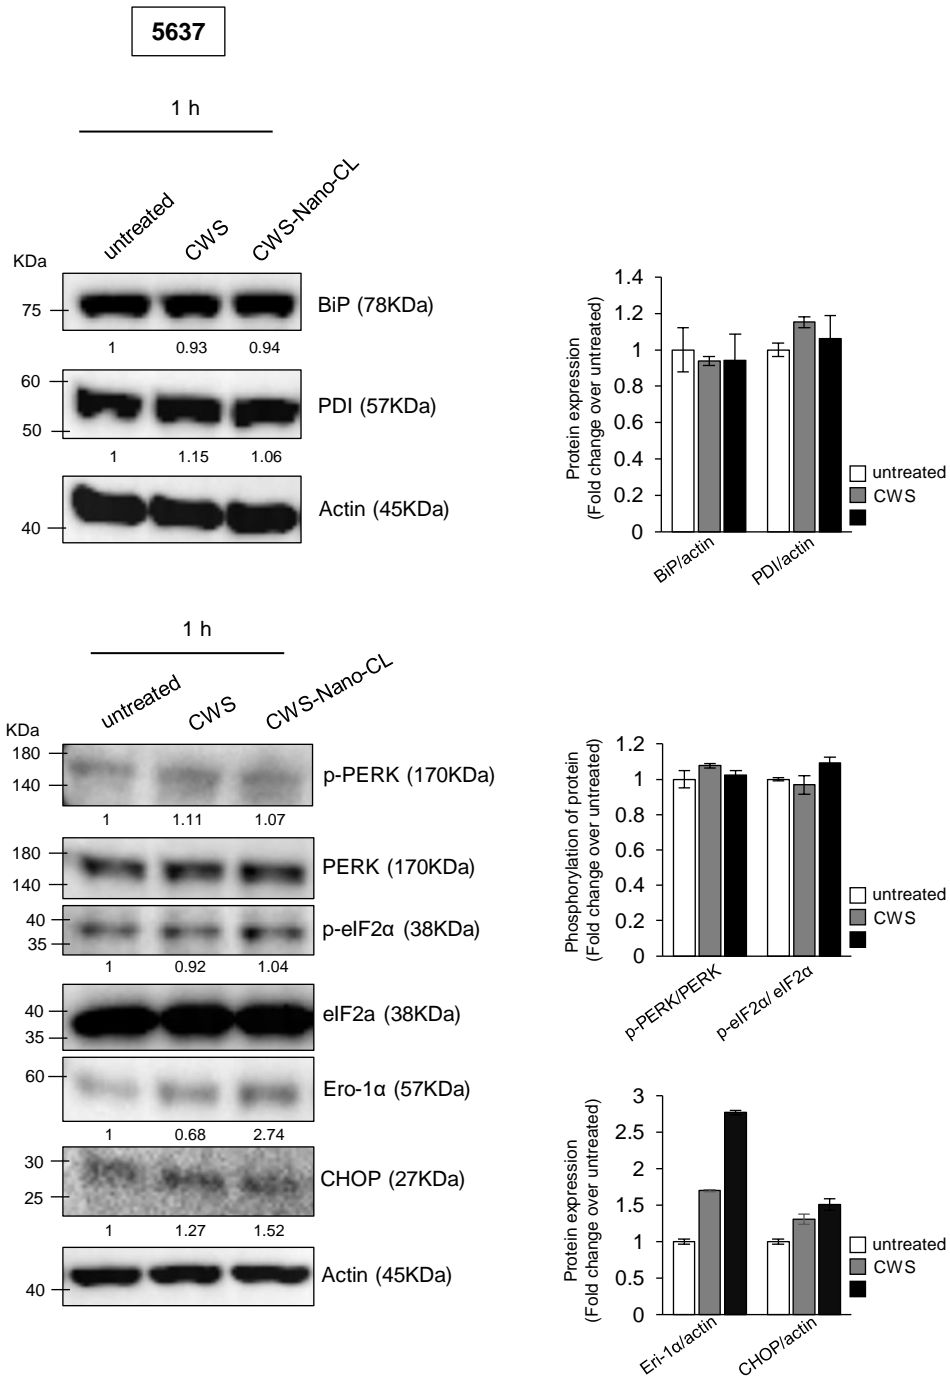

Figure S5. The quantitation results of Figure 5A

**B**

5637

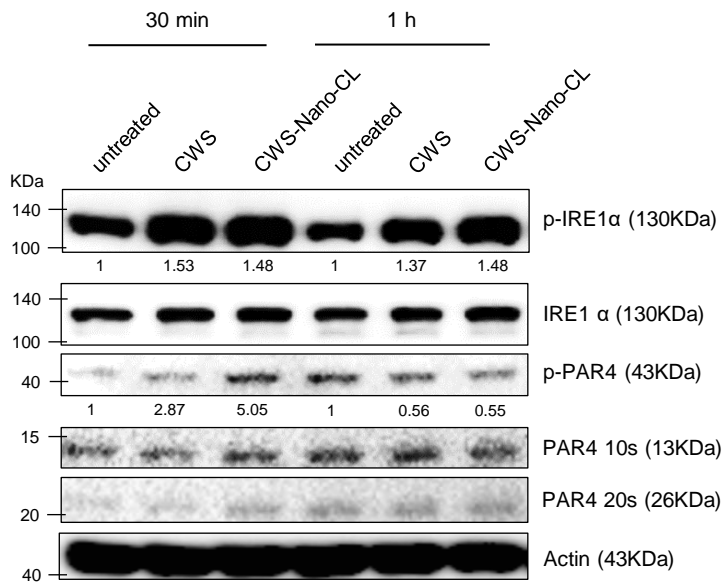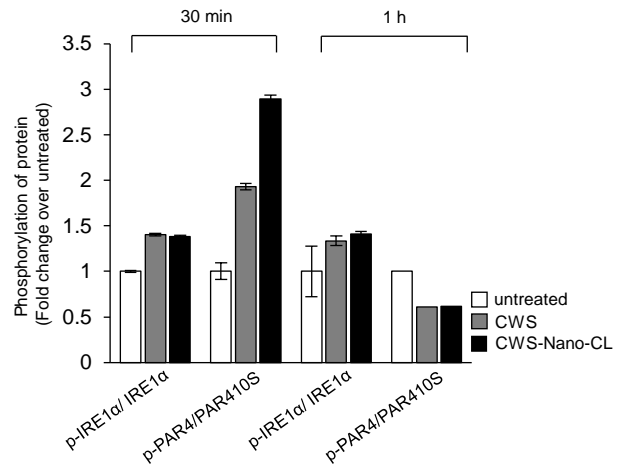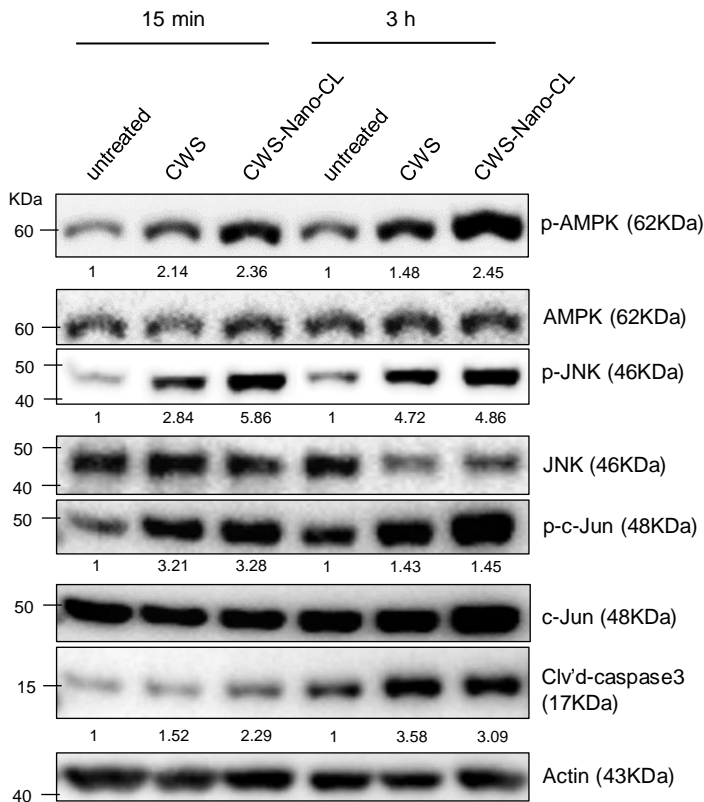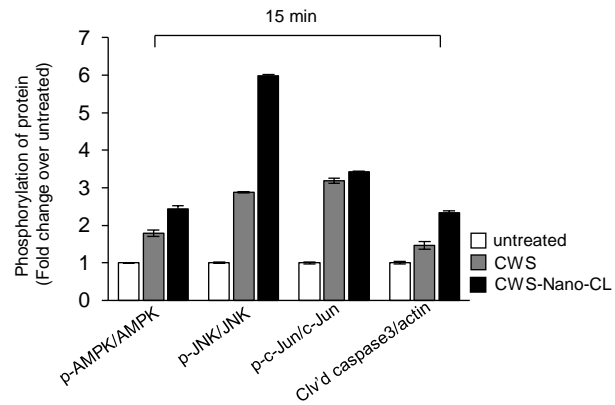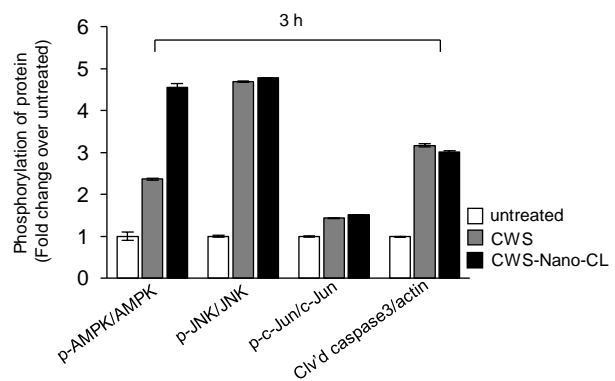**Figure S5.** The quantitation results of Figure 5B



# Supplementary Fig. 6

C

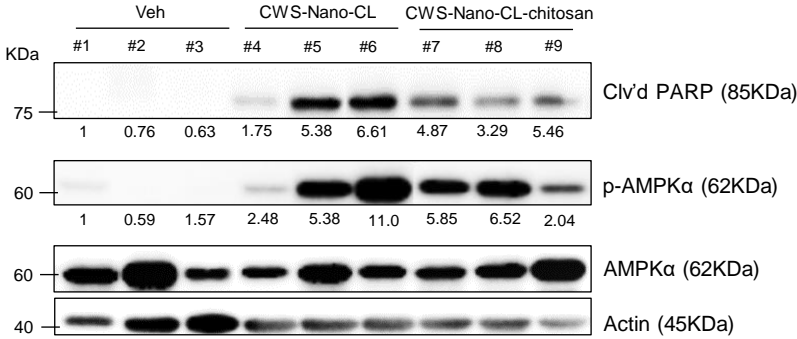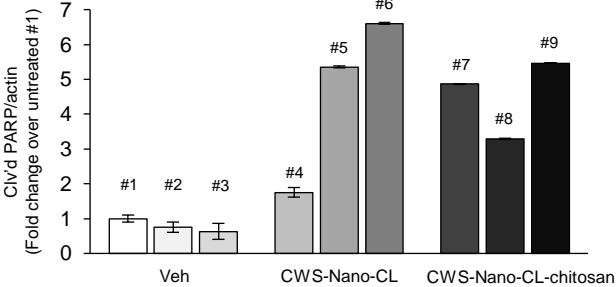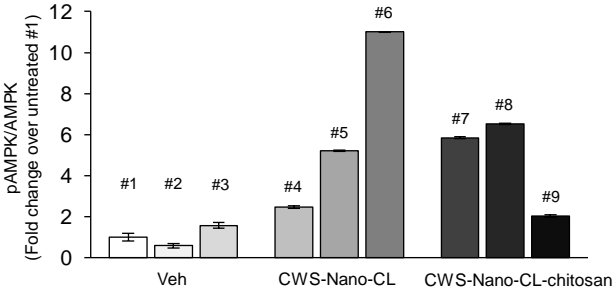

Figure S6. The quantitation results of Figure 6C

**Figure S7: Whole blot showing all the bands with molecular weight markers on the Western blotting.**

**Figure 2D**

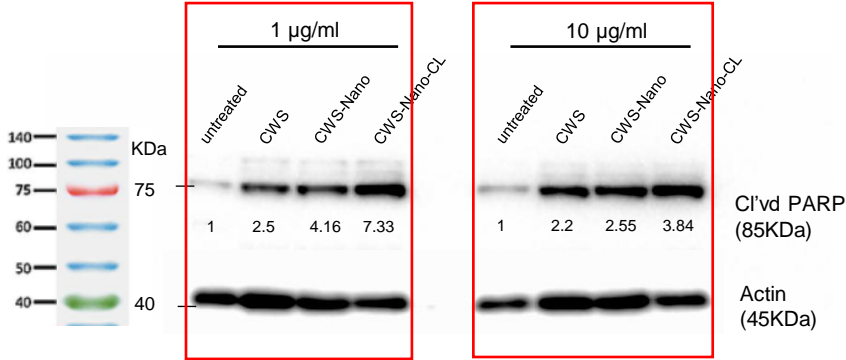

**Figure 3A**

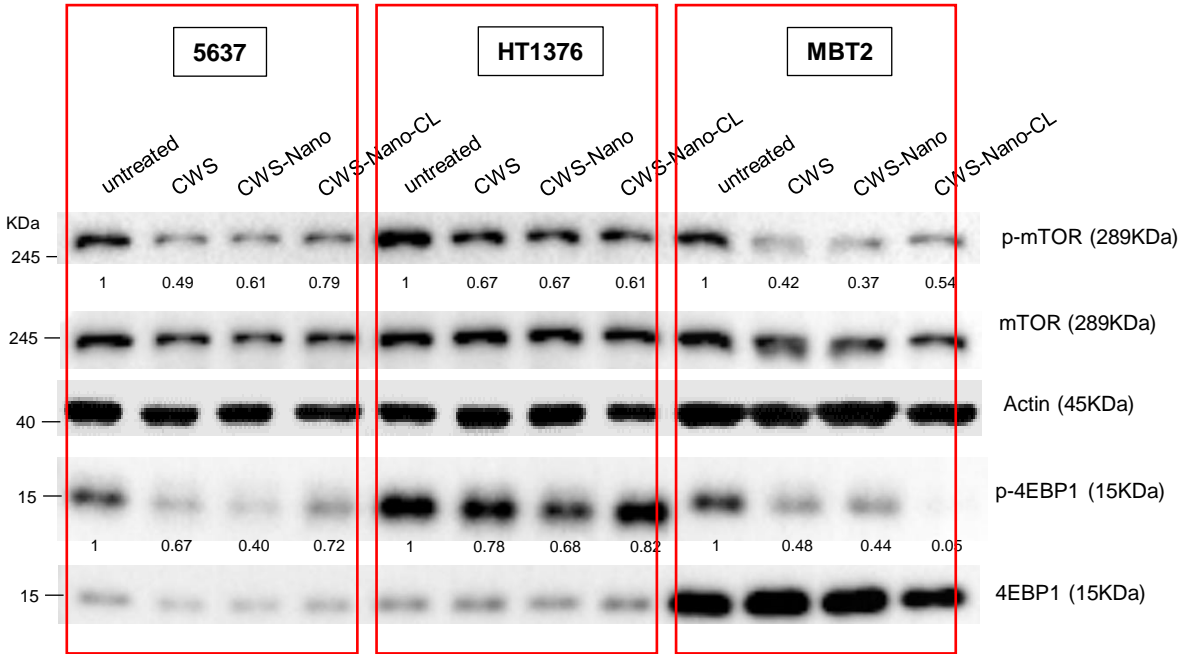

### Figure 3B

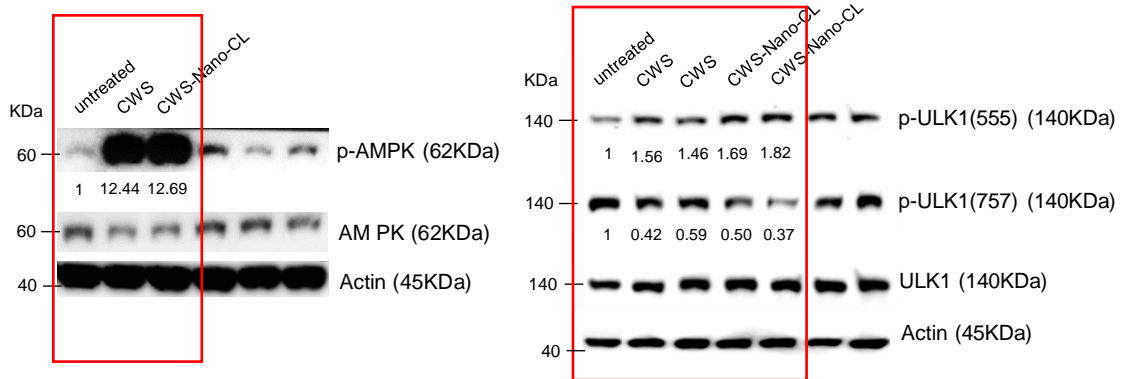

### Figure 3C

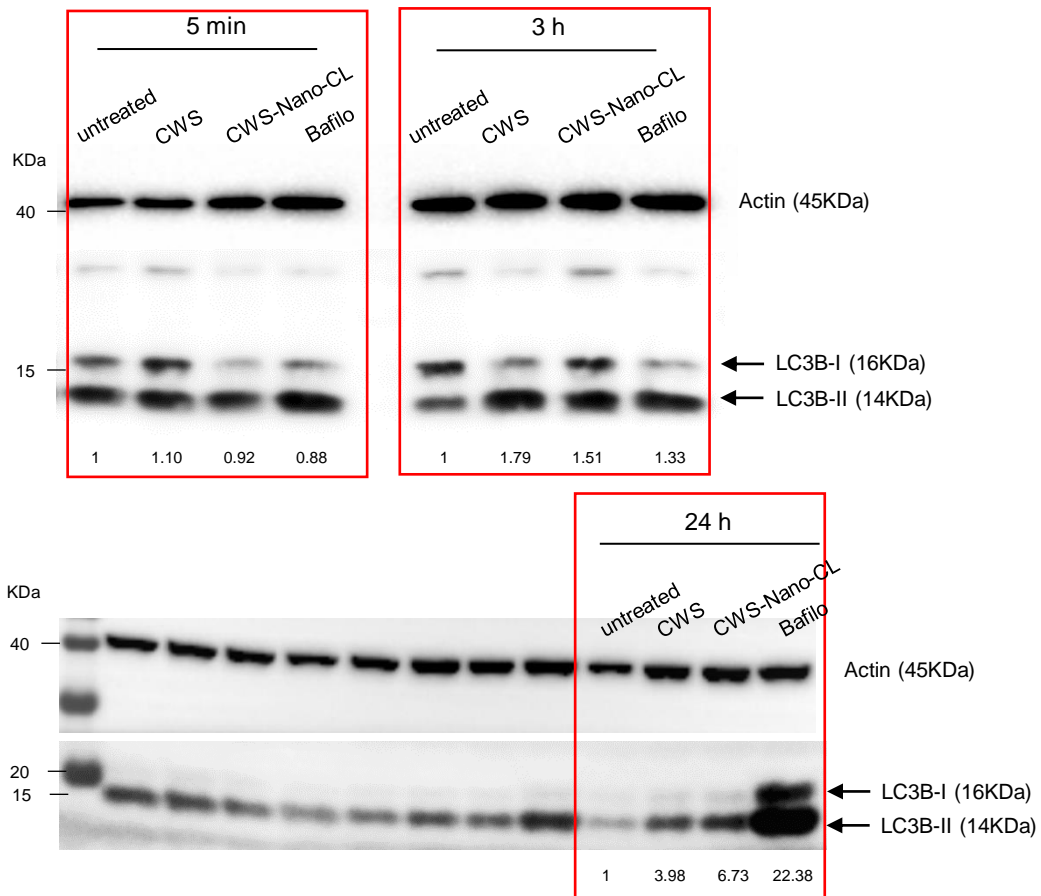

**Figure 5A**

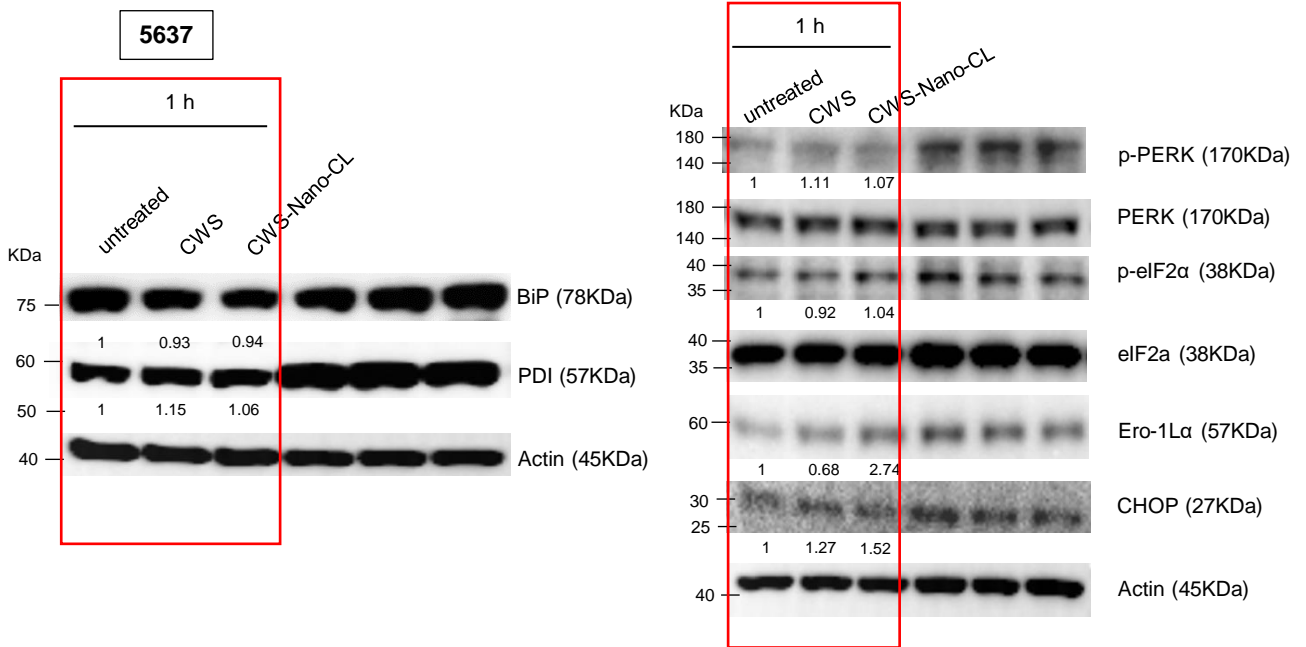

**Figure 5B**

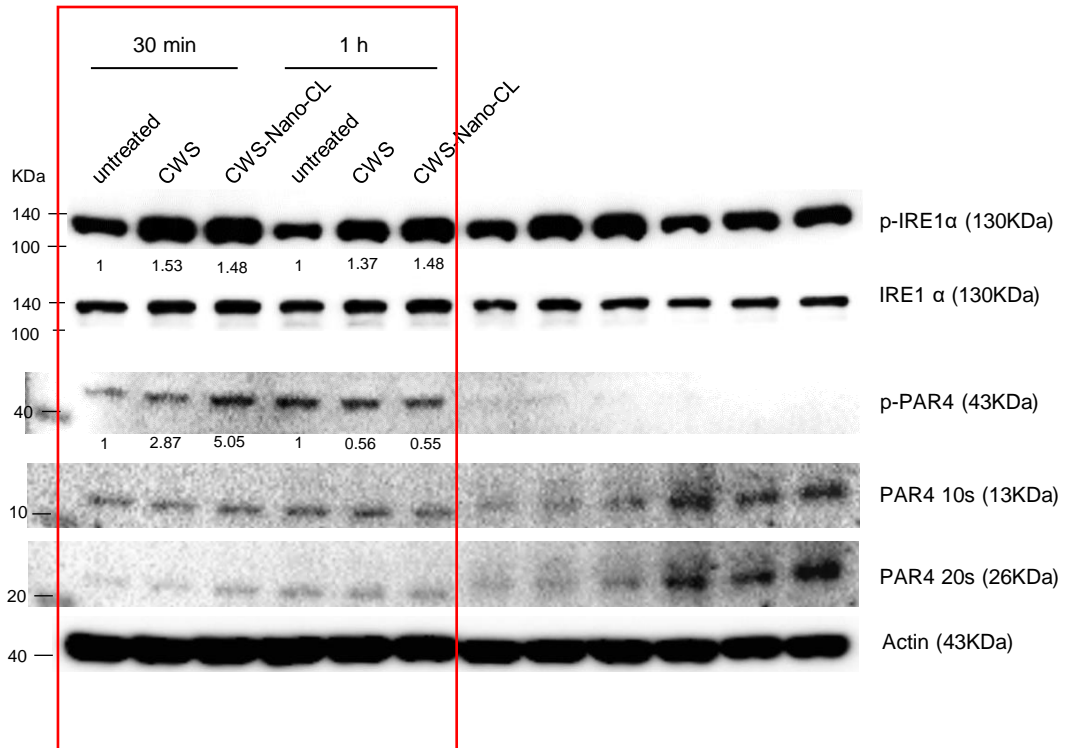

**Figure 5B**

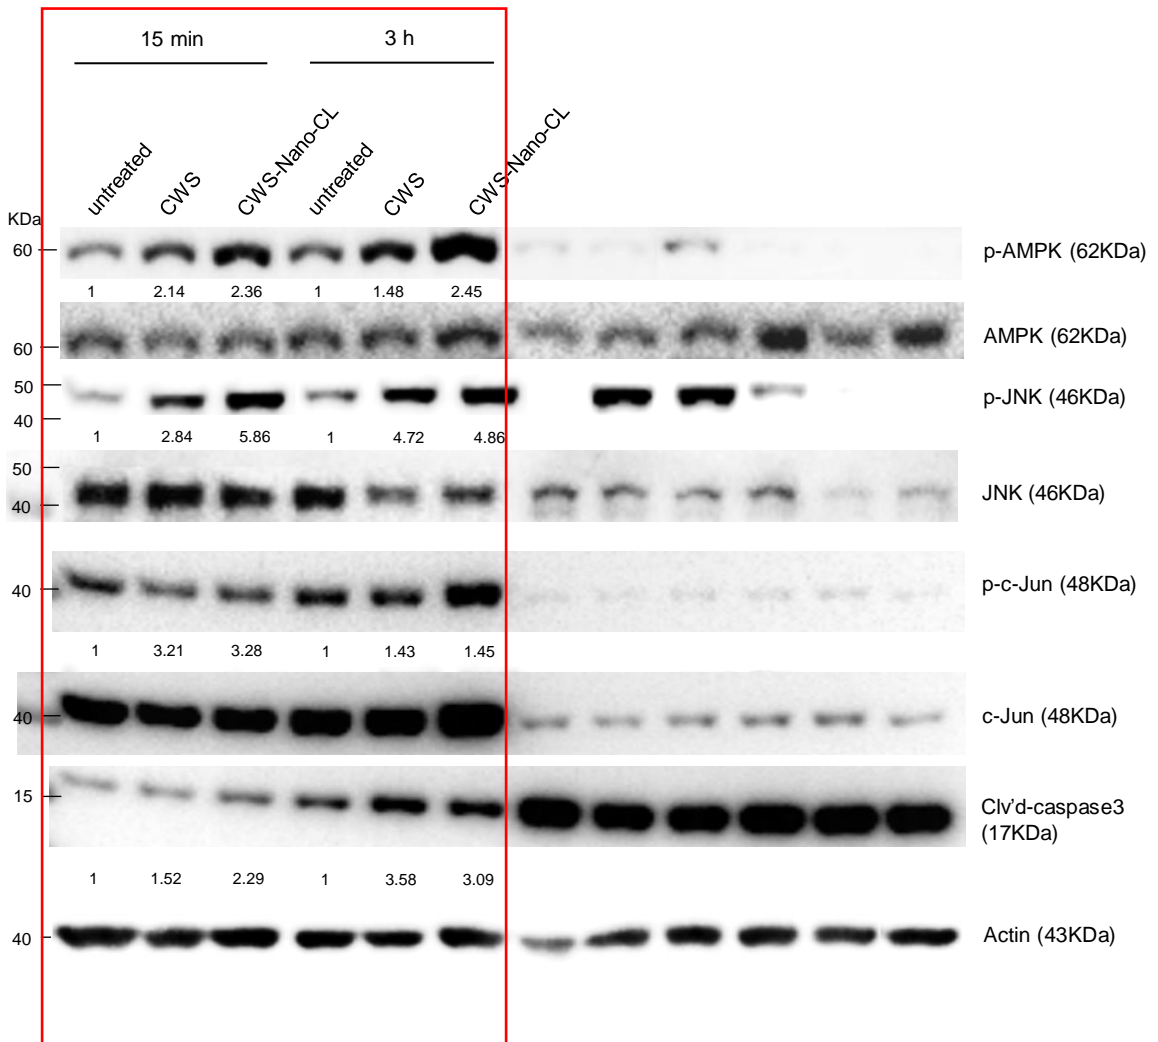

Supplement: cancers-12-03679-s001.pdf [file cancers-12-03679-s001.pdf]
